# Supplementary material
Source: PubMed Central journal article supplement (PMC4346605)
Supplement: Supp_Figure2.pdf [file Supp_Figure2.pdf]

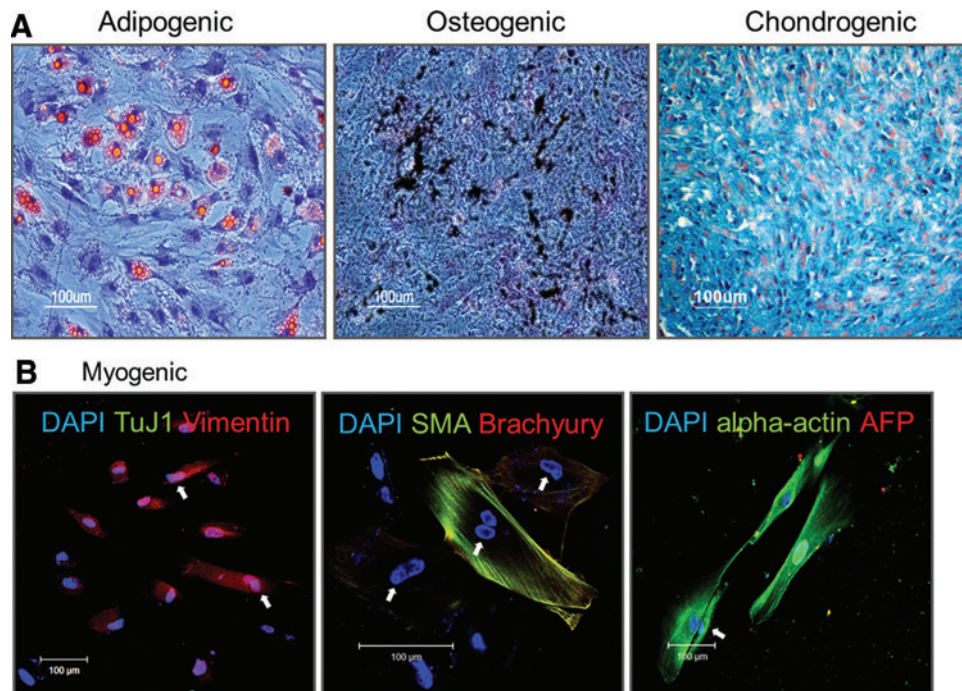

**SUPPLEMENTARY FIG. S2.** Differentiation of BM-MSCs into various mesenchymal derivatives. **(A)** Adipogenic differentiation and characterization by Oil Red O staining. Osteogenic differentiation and characterization by von Kossa staining. Chondrogenic differentiation and characterization by Alcian Blue staining. Scale bar, 100 µm. **(B)** Myogenic differentiation. Immunocytochemistry for Vimentin and TuJ1 (*left*), SMA and Brachyury (*middle*), and  $\alpha$ -actin and AFP (*right*). Multi-nucleated cells are depicted by *white arrows*. Scale bar, 100 µm.
