# Supplementary material
Source: PubMed Central journal article supplement (PMC4346605)
Supplement: Supp_Figure3.pdf [file Supp_Figure3.pdf]

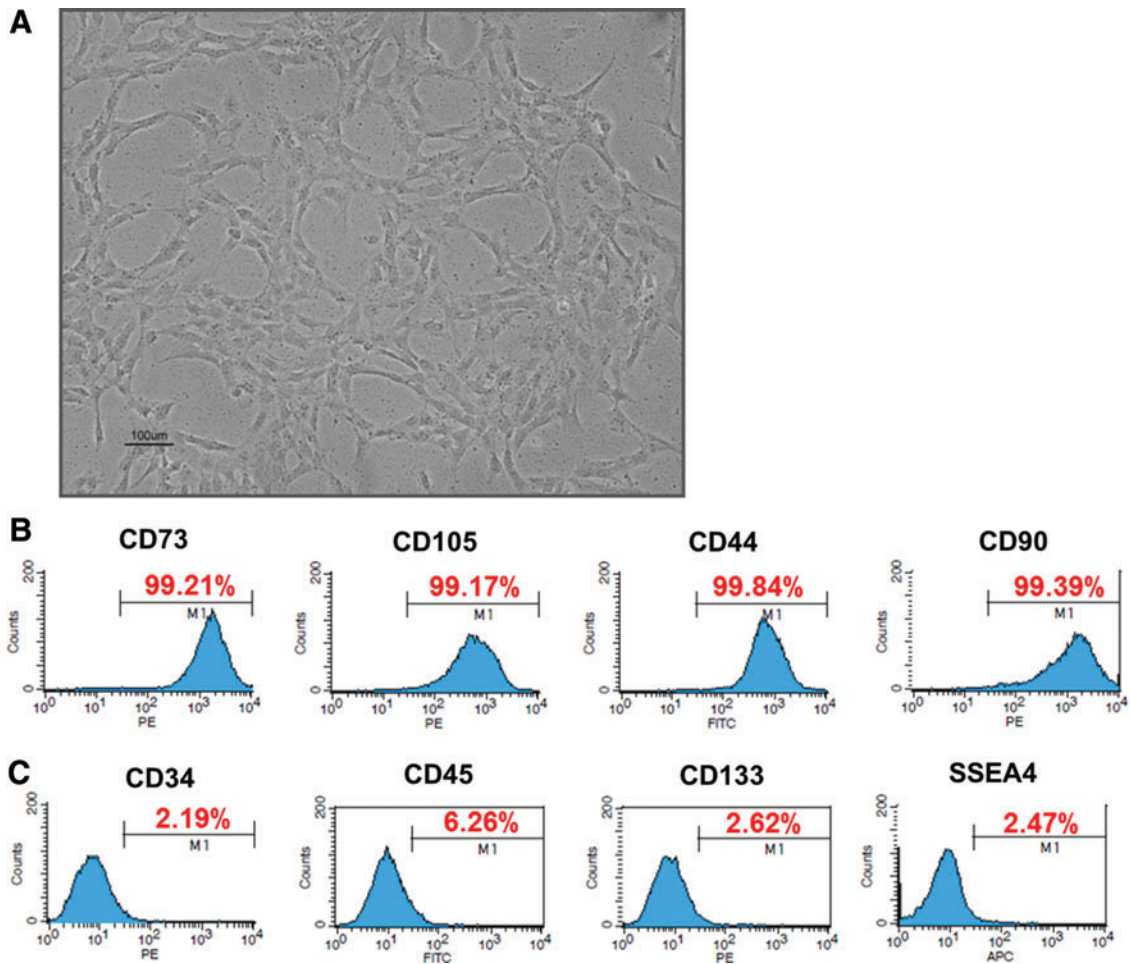

**SUPPLEMENTARY FIG. S3.** The isolated MSCs-like populations in normal culture conditions. (A) Morphology of isolated hESC-MSCs cultured in alpha minimum essential medium (MEM) containing 20% fetal bovine serum. (B, C) FACS analysis of a panel of MSC markers.
