# Supplementary material
Source: PubMed Central journal article supplement (PMC4346605)
Supplement: Supp_Table1.pdf [file Supp_Table1.pdf]

SUPPLEMENTARY TABLE S1. PRIMER SEQUENCE USED FOR QUANTITATIVE REAL-TIME POLYMERASE CHAIN REACTION

| <i>Oligo name</i> | <i>5'-Forward primer sequence-3'</i> | <i>5'-Reverse primer sequence-3'</i> |
|-------------------|--------------------------------------|--------------------------------------|
| Oct-3/4           | Gccgcagcttacacatgttcttga             | agctctgcagaagaactcgagca              |
| Nanog             | gtcccaaagggcaaaaaccactt              | agctgggtggaagagaacacagt              |
| E-Cadherin        | cgagagctacacgttcacgg                 | gggtgtcgagggaaaaatagg                |
| Fibronectin       | actctgacaggcctcaccaga                | acgggccactttctctccaa                 |
| PPAR $\gamma$     | cttgcaagtgggatgt                     | ctttggtcagcgggaa                     |
| SREBF1            | aggatctggtggtggg                     | ggttcctctgctgagt                     |
| ALP               | gaaccccaaaggcttctct                  | ggggtgtatccaccaaagt                  |
| BSP               | tcctcctctgaaacggttcc                 | cgaactatgccatctccatt                 |
| Aggrecan          | aaaccacctctgattccac                  | tcctcctgattcagctct                   |
| Collagen II       | gaaacatcaatggtggttcc                 | cgataacagtcttgcacctt                 |
| MyoD              | gcaggtgtaaccgtaacca                  | cacacaccatgctcagaga                  |
| GAPDH             | agaaggctggggtcatttg                  | aggggccatccagctctc                   |
